# Supplementary material for: BUBR1 as a Prognostic Biomarker in Canine Oral Squamous Cell Carcinoma
Source: MDPI journal article supplement (doi:10.3390/ani12223082), 2022-11-09
Supplement: s1 [file s1]

## SUPPLEMENTAL MATERIAL

**Figure S1**

```

438 YEPEETVEVPVLKKRREVLVD ITTAKDACVNNSALGGEVYRLPPQ KEETQSCPNSLEDNNLQLEKSSVSIHTTPVVSLSPHKNLPV DMQLKKEKCKVKLIGVPADA 542 Human SPINDLY
508 YEPEEKSEVPVPKKRREVLPMDVTTPNNVCANAVLGGEDYRLPPQQVEAQCYPSSEDNNLQLEKTVSINTLG ISLSPHK SLPMD IQPMKEKCKVKFLGVSADS 610 Canis lupus familiaris SPINDLY

276 DENADEASTAELSKPTVQPWIAPPMPRAKENELQAGPWNTGRSLEHRPRGNTASLIAVPAVLPSTPYVEETARQPVMTPKIEPSINHILSTRKPGKEEGDLLQRVQSHQQ 387 Human BUBR1
371 DENADEASGAELFKPTVQPWIAPPVSRAKENELQAGPWNTGRPLEYRPHGGTASVTTVPSLLPSTPYVEETAQQPVMTPKIEPSINHILSTRKPGKEEGDLLQRVQSHQQ 482 Canis lupus familiaris BUBR1
  
```

**Figure S1.** Aminoacids (aa) alignment of the binding site of the SPINDLY and BUBR1 antibodies in the Human SPINDLY and BUBR1 proteins sequences with the possible binding site sequence of Canis lupus familiaris. Red represents no similar aa and blue similar aa. The lack of manufacture information regarding BUB3 peptide sequence recognized by the antibody didn't allow us to show the aa alignment for this antibody. However, because human and dog Bub3 proteins share 100% amino acid identity, the putative epitopes recognized by Bub3 antibody are expected to be the same.

**Supplemental Table S1.**

**Table S1.** Identity and similarity in percentage for the Human and Canis lupus familiaris protein sequences. For the alignment with the known antibody binding sequences the local alignment (Smith-Waterman) was performed. For the remaining alignments the global alignment (Needleman-Wunsch) was performed.

|                             | Identity (%) | Similarity (%) |
|-----------------------------|--------------|----------------|
| SPINDLY                     | 70.37        | 77.07          |
| SPINDLY (antibody sequence) | 64.76        | 78.10          |
| BUBR1                       | 80.40        | 84.20          |
| BUBR1 (antibody sequence)   | 86.61        | 91.96          |
| BUB3 isoform 1              | 100          | 100            |
| BUB3 isoform 2              | 99.39        | 99.39          |
| BUB3 isoform 3              | 83.84        | 83.84          |

**Supplemental Table S2.** Clinicopathological characteristics and BubR1 expression comparison.

| Variables   |              | BubR1 Extent Score |      |          | BubR1 Intensity Score |          |         |
|-------------|--------------|--------------------|------|----------|-----------------------|----------|---------|
|             |              | ≤49%               | ≥50% | P-Value  | (0/Weak/Moderate)     | (Strong) | P-Value |
| Gender      | Female       | 13                 | 15   | 0.784    | 14                    | 14       | 1.000   |
|             | Male         | 16                 | 16   |          | 16                    | 16       |         |
| Age (years) | <7           | 17                 | 13   | 0.200    | 17                    | 13       | 0.306   |
|             | ≥7           | 12                 | 18   |          | 13                    | 17       |         |
| Breed       | Small        | 8                  | 2    | 0.030 ** | 5                     | 5        | 0.501   |
|             | Medium       | 3                  | 2    |          | 5                     | 0        |         |
|             | Large        | 2                  | 10   |          | 6                     | 6        |         |
|             | Undetermined | 13                 | 13   |          | 13                    | 13       |         |

|                                       |                              |    |    |          |    |    |       |
|---------------------------------------|------------------------------|----|----|----------|----|----|-------|
| <b>Tumour Location</b>                | Mouth (NOS)                  | 6  | 7  | 0.664    | 6  | 7  | 0.442 |
|                                       | Gingiva                      | 12 | 8  |          | 13 | 7  |       |
|                                       | Tongue                       | 5  | 7  |          | 5  | 7  |       |
|                                       | Oropharynx                   | 4  | 4  |          | 3  | 5  |       |
|                                       | Palate                       | 2  | 5  |          | 3  | 4  |       |
| <b>Histological type</b>              | Papillary SCC                | 8  | 2  | 0.029    | 6  | 4  | 0.482 |
|                                       | Conventional SCC             | 21 | 29 |          | 24 | 26 |       |
| <b>Bone Invasion</b>                  | Yes                          | 8  | 2  | 0.029    | 8  | 2  | 0.039 |
|                                       | No                           | 21 | 29 |          | 22 | 28 |       |
| <b>Vascular Invasion</b>              | Yes                          | 1  | 3  | 0.430    | 1  | 3  | 0.305 |
|                                       | No                           | 28 | 28 |          | 29 | 27 |       |
| <b>Histological grade (Anneroth)</b>  | Well differentiated          | 10 | 9  | 0.653    | 7  | 12 | 0.169 |
|                                       | Moderate differentiated      | 19 | 22 |          | 23 | 18 |       |
|                                       | Poor differentiated          | -  | -  |          | -  | -  |       |
| <b>Histological grade (Bryne)</b>     | Well differentiated          | 14 | 11 | 0.283    | 12 | 13 | 0.959 |
|                                       | Moderate differentiated      | 15 | 18 |          | 18 | 15 |       |
|                                       | Poor differentiated          | 0  | 2  |          | 0  | 2  |       |
| <b>Mitosis</b>                        | 0-1/hpf                      | 7  | 10 | 0.675    | 7  | 10 | 0.237 |
|                                       | 2-3/hpf                      | 12 | 9  |          | 10 | 11 |       |
|                                       | 4-5/hpf                      | 8  | 8  |          | 9  | 7  |       |
|                                       | >5/hpf                       | 2  | 4  |          | 4  | 2  |       |
| <b>Lymphoplasmacytic infiltration</b> | Weak                         | 8  | 10 | 0.765    | 10 | 8  | 0.509 |
|                                       | Moderate                     | 13 | 11 |          | 12 | 12 |       |
|                                       | Marked                       | 8  | 10 |          | 8  | 10 |       |
| <b>Necrosis</b>                       | Yes                          | 12 | 9  | 0.320    | 12 | 9  | 0.421 |
|                                       | No                           | 17 | 22 |          | 18 | 21 |       |
| <b>Pattern of invasion *</b>          | I                            | 13 | 7  | 0.142    | 8  | 12 | 0.876 |
|                                       | II                           | 9  | 13 |          | 14 | 8  |       |
|                                       | III                          | 7  | 8  |          | 8  | 7  |       |
|                                       | IV                           | 0  | 3  |          | 0  | 3  |       |
| <b>Stage of invasion *</b>            | I                            | 0  | 0  | 0.029 ** | 17 | 22 | 0.159 |
|                                       | II                           | 23 | 16 |          |    | 8  |       |
|                                       | III                          | 5  | 15 |          | 12 | 0  |       |
|                                       | IV                           | 1  | 0  |          | 1  |    |       |
| <b>Treatment *</b>                    | Surgery                      | 7  | 4  | 0.289    | 6  | 5  | 0.381 |
|                                       | Chemotherapy                 | 1  | 3  |          | 2  | 2  |       |
|                                       | Palliative treatment/support | 14 | 21 |          | 14 | 21 |       |
| <b>Tumour stage</b>                   | I + II                       | 12 | 7  | 0.034    | 10 | 9  | 0.611 |
|                                       | III + IV                     | 10 | 21 |          | 14 | 17 |       |

\* Pattern of invasion also evaluated using the categorization of I + II vs III + IV (P=0.342 and P=0.576 for extent and intensity scores respectively) and I + II + III vs IV (P=0.070 and P=0.277); stage of invasion also evaluated using the categorization of I + II vs III + IV (P=0.026 and P=0.180); and treatment using the categorization of treatment in Surgery/Chemotherapy vs. Palliative treatment/support (P=0.389 and P=0.389). \*\* Pairwise multiple comparisons with bonferroni adjustment showed differences between small vs large breed (P=0.020), stage of invasion between stages II vs III (P=0.043); IV vs II (P=0.003) and IV vs III (P=0.003).

**Supplemental Table S3.** Clinicopathological characteristics and Bub3 expression comparison

|                                |                         | Bub3 Extent Score |      |         | Bub3 Intensity Score |          |         |
|--------------------------------|-------------------------|-------------------|------|---------|----------------------|----------|---------|
| Variables                      |                         | ≤74%              | ≥75% | P-Value | (0/Weak/Moderate)    | (Strong) | P-Value |
| Gender                         | Female                  | 10                | 17   | 0.557   | 21                   | 6        | 0.128   |
|                                | Male                    | 13                | 16   |         | 17                   | 12       |         |
| Age (years)                    | <7                      | 9                 | 19   | 0.178   | 18                   | 10       | 0.571   |
|                                | ≥7                      | 14                | 14   |         | 20                   | 8        |         |
| Breed                          | Small                   | 4                 | 3    | 0.622   | 7                    | 0        | 0.259   |
|                                | Medium                  | 2                 | 3    |         | 3                    | 2        |         |
|                                | Large                   | 3                 | 8    |         | 8                    | 3        |         |
|                                | Undetermined            | 12                | 14   |         | 16                   | 10       |         |
| Tumour Location                | Mouth (NOS)             | 5                 | 5    | 0.211   | 7                    | 3        | 0.825   |
|                                | Gingiva                 | 5                 | 14   |         | 14                   | 5        |         |
|                                | Tongue                  | 6                 | 6    |         | 8                    | 4        |         |
|                                | Oropharynx              | 2                 | 6    |         | 4                    | 4        |         |
|                                | Palate                  | 5                 | 2    |         | 5                    | 2        |         |
| Histological type              | Papillary SCC           | 3                 | 5    | 0.863   | 7                    | 1        | 0.203   |
|                                | Conventional SCC        | 20                | 28   |         | 31                   | 17       |         |
| Bone Invasion                  | Yes                     | 2                 | 7    | 0.214   | 8                    | 1        | 0.144   |
|                                | No                      | 21                | 26   |         | 30                   | 17       |         |
| Vascular Invasion              | Yes                     | 2                 | 2    | 0.771   | 4                    | 0        | 0.270   |
|                                | No                      | 21                | 31   |         | 34                   | 18       |         |
| Histological grade (Anneroth)  | Well differentiated     | 5                 | 13   | 0.168   | 13                   | 5        | 0.633   |
|                                | Moderate differentiated | 18                | 20   |         | 25                   | 13       |         |
|                                | Poor differentiated     | -                 | -    |         | -                    | -        |         |
| Histological grade (Bryne)     | Well differentiated     | 11                | 13   | 0.770   | 18                   | 6        | 0.314   |
|                                | Moderate differentiated | 11                | 19   |         | 18                   | 12       |         |
|                                | Poor differentiated     | 1                 | 1    |         | 2                    | 0        |         |
| Mitosis                        | 0-1/hpf                 | 5                 | 11   | 0.141   | 12                   | 4        | 0.742   |
|                                | 2-3/hpf                 | 6                 | 12   |         | 12                   | 6        |         |
|                                | 4-5/hpf                 | 7                 | 9    |         | 11                   | 5        |         |
|                                | >5/hpf                  | 5                 | 1    |         | 3                    | 3        |         |
| Lymphoplasmacytic infiltration | Weak                    | 7                 | 9    | 0.960   | 10                   | 6        | 0.863   |
|                                | Moderate                | 9                 | 14   |         | 16                   | 7        |         |
|                                | Marked                  | 7                 | 10   |         | 12                   | 5        |         |
| Necrosis                       | Yes                     | 9                 | 10   | 0.496   | 14                   | 5        | 0.507   |
|                                | No                      | 14                | 23   |         | 24                   | 13       |         |
| Pattern of invasion *          | I                       | 6                 | 11   | 0.288   | 13                   | 4        | 0.219   |
|                                | II                      | 12                | 9    |         | 11                   | 10       |         |
|                                | III                     | 4                 | 11   |         | 11                   | 4        |         |
|                                | IV                      | 1                 | 2    |         | 3                    | 0        |         |
| Stage of invasion *            | I                       | 0                 | 0    | 0.461   | 0                    | 0        | 0.309   |
|                                | II                      | 13                | 22   |         | 25                   | 10       |         |
|                                | III                     | 10                | 10   |         | 13                   | 7        |         |
|                                | IV                      | 0                 | 1    |         | 0                    | 1        |         |
| Treatment *                    | Surgery                 | 4                 | 6    | 0.596   | 7                    | 3        | 0.783   |
|                                | Chemotherapy            | 2                 | 2    |         | 2                    | 2        |         |
|                                | Palliative              | 10                | 25   |         | 22                   | 13       |         |
|                                | treatment/support       |                   |      |         |                      |          |         |

|                                                                                                                                                                                                                                                                                                                                                                                                                                               |                    |         |         |       |          |         |       |
|-----------------------------------------------------------------------------------------------------------------------------------------------------------------------------------------------------------------------------------------------------------------------------------------------------------------------------------------------------------------------------------------------------------------------------------------------|--------------------|---------|---------|-------|----------|---------|-------|
| <b>Tumour stage</b>                                                                                                                                                                                                                                                                                                                                                                                                                           | I + II<br>III + IV | 7<br>10 | 9<br>21 | 0.442 | 14<br>19 | 2<br>12 | 0.065 |
| * Pattern of invasion also evaluated using the categorization of I + II vs III + IV (P=0.168 and P=0.278 for extent and intensity scores respectively) and I + II + III vs IV (P=0.565 and P=0.367); stage of invasion also evaluated using the categorization of I + II vs III + IV (P=0.445 and 0.464); and treatment using the categorization of treatment in Surgery/ Chemotherapy vs Palliative treatment/support (P=0.340 and P=0.926). |                    |         |         |       |          |         |       |

Supplemental Table S4. Clinicopathological characteristics and Spindly expression comparison

| Variables                             |                         | Spindly Extent Score |      |         | Spindly Intensity Score |          |         |
|---------------------------------------|-------------------------|----------------------|------|---------|-------------------------|----------|---------|
|                                       |                         | ≤49%                 | ≥50% | P-Value | (0/Weak/Moderate)       | (Strong) | P-Value |
| <b>Gender</b>                         | Female                  | 10                   | 16   | 0.139   | 23                      | 3        | 0.888   |
|                                       | Male                    | 17                   | 12   |         | 26                      | 3        |         |
| <b>Age (years)</b>                    | <7                      | 14                   | 15   | 0.899   | 26                      | 3        | 0.888   |
|                                       | ≥7                      | 13                   | 13   |         | 23                      | 3        |         |
| <b>Breed</b>                          | Small                   | 6                    | 3    | 0.330   | 8                       | 1        | 0.748   |
|                                       | Medium                  | 3                    | 2    |         | 5                       | 0        |         |
|                                       | Large                   | 7                    | 4    |         | 10                      | 1        |         |
|                                       | Undetermined            | 9                    | 15   |         | 20                      | 4        |         |
| <b>Tumour Location</b>                | Mouth (NOS)             | 5                    | 6    | 0.297   | 10                      | 1        | 0.360   |
|                                       | Gingiva                 | 10                   | 10   |         | 19                      | 1        |         |
|                                       | Tongue                  | 7                    | 2    |         | 7                       | 2        |         |
|                                       | Oropharynx              | 2                    | 6    |         | 6                       | 2        |         |
|                                       | Palate                  | 3                    | 4    |         | 7                       | 0        |         |
| <b>Histological type</b>              | Papillary SCC           | 3                    | 5    | 0.550   | 8                       | 0        | 0.582   |
|                                       | Conventional SCC        | 24                   | 23   |         | 41                      | 6        |         |
| <b>Bone Invasion</b>                  | Yes                     | 5                    | 5    | 0.950   | 10                      | 0        | 0.225   |
|                                       | No                      | 22                   | 23   |         | 39                      | 6        |         |
| <b>Vascular Invasion</b>              | Yes                     | 1                    | 3    | 0.405   | 3                       | 1        | 0.628   |
|                                       | No                      | 26                   | 25   |         | 46                      | 5        |         |
| <b>Histological grade (Anneroth)</b>  | Well differentiated     | 7                    | 12   | 0.191   | 17                      | 2        | 0.948   |
|                                       | Moderate differentiated | 20                   | 16   |         | 32                      | 4        |         |
|                                       | Poor differentiated     | -                    | -    |         | -                       | -        |         |
| <b>Histological grade (Bryne)</b>     | Well differentiated     | 15                   | 10   | 0.175   | 22                      | 3        | 0.873   |
|                                       | Moderate differentiated | 12                   | 16   |         | 25                      | 3        |         |
|                                       | Poor differentiated     | 0                    | 2    |         | 2                       | 0        |         |
| <b>Mitosis *</b>                      | 0-1/hpf                 | 6                    | 11   | 0.037** | 15                      | 2        | 0.826   |
|                                       | 2-3/hpf                 | 7                    | 11   |         | 17                      | 1        |         |
|                                       | 4-5/hpf                 | 8                    | 6    |         | 12                      | 2        |         |
|                                       | >5/hpf                  | 6                    | 0    |         | 5                       | 1        |         |
| <b>Lymphoplasmacytic infiltration</b> | Weak                    | 4                    | 12   | 0.046** | 16                      | 0        | 0.230   |
|                                       | Moderate                | 12                   | 11   |         | 19                      | 4        |         |
|                                       | Marked                  | 11                   | 5    |         | 14                      | 2        |         |
| <b>Necrosis</b>                       | Yes                     | 10                   | 10   | 0.920   | 18                      | 2        | 0.871   |
|                                       | No                      | 17                   | 18   |         | 31                      | 4        |         |
| <b>Pattern of invasion *</b>          | I                       | 8                    | 10   | 0.661   | 16                      | 2        | 0.628   |
|                                       | II                      | 12                   | 8    |         | 18                      | 2        |         |
|                                       | III                     | 6                    | 8    |         | 13                      | 1        |         |

|                     |                   |    |    |       |    |   |       |
|---------------------|-------------------|----|----|-------|----|---|-------|
|                     | IV                | 1  | 2  |       | 2  | 1 |       |
|                     | I                 | 0  | 0  |       | 0  | 0 |       |
| Stage of invasion * | II                | 14 | 20 | 0.248 | 30 | 4 | 0.922 |
|                     | III               | 12 | 8  |       | 18 | 2 |       |
|                     | IV                | 1  | 0  |       | 1  | 0 |       |
| Treatment *         | Surgery           | 5  | 6  | 0.988 | 11 | 0 | 0.319 |
|                     | Chemotherapy      | 2  | 2  |       | 3  | 1 |       |
|                     | Palliative        | 16 | 18 |       | 29 | 5 |       |
|                     | treatment/support |    |    |       |    |   |       |
| Tumour stage        | I + II            | 8  | 8  | 0.602 | 15 | 1 | 0.488 |
|                     | III + IV          | 13 | 18 |       | 27 | 4 |       |

\* Pattern of invasion also evaluated using the categorization of I + II vs III + IV (P=0.436 and P=0.893 for extent and intensity scores respectively) and I + II + III vs IV (P=0.634 and P=0.054); stage of invasion also evaluated using the categorization of I + II vs III + IV (P=0.139 and P=0.797); and treatment using the categorization of treatment in Surgery/ Chemotherapy vs Palliative treatment/support (P=0.980 and P=0.434). \*\* Pairwise multiple comparisons with bonferroni adjustment showed differences between number of mitosis between >5 vs 0-1 (P=0.042), squamous differentiation between 5-20% vs 0-5% category (P=0.034), and for lymphoplasmacytic infiltration between strong vs weak categories (P=0.043).

**Supplemental Table S5.** Clinicopathological characteristics and Ki-67 expression comparison

|                               |                         | Ki-67 Extent Score |      |         | Ki-67 Intensity Score |          |         |
|-------------------------------|-------------------------|--------------------|------|---------|-----------------------|----------|---------|
| Variables                     |                         | ≤49%               | ≥50% | P-Value | (0/Weak/Moderate)     | (Strong) | P-Value |
| Gender                        | Female                  | 21                 | 6    | 0.646   | 16                    | 11       | 0.453   |
|                               | Male                    | 21                 | 8    |         | 20                    | 9        |         |
| Age (years)                   | <7                      | 20                 | 9    | 0.284   | 19                    | 10       | 0.843   |
|                               | ≥7                      | 22                 | 5    |         | 17                    | 10       |         |
| Breed                         | Small                   | 9                  | 0    | 0.136   | 7                     | 2        | 0.385   |
|                               | Medium                  | 4                  | 1    |         | 4                     | 1        |         |
|                               | Large                   | 6                  | 5    |         | 5                     | 6        |         |
|                               | Undetermined            | 19                 | 6    |         | 17                    | 8        |         |
| Tumour Location               | Mouth (NOS)             | 8                  | 2    | 0.697   | 8                     | 2        | 0.452   |
|                               | Gingiva                 | 16                 | 4    |         | 13                    | 7        |         |
|                               | Tongue                  | 7                  | 4    |         | 7                     | 4        |         |
|                               | Oropharynx              | 5                  | 3    |         | 3                     | 5        |         |
|                               | Palate                  | 6                  | 1    |         | 5                     | 2        |         |
| Histological type             | Papillary SCC           | 8                  | 0    | 0.08    | 6                     | 2        | 0.498   |
|                               | Conventional SCC        | 34                 | 14   |         | 30                    | 18       |         |
| Bone Invasion                 | Yes                     | 7                  | 3    | 0.690   | 8                     | 2        | 0.257   |
|                               | No                      | 35                 | 11   |         | 28                    | 18       |         |
| Vascular Invasion             | Yes                     | 3                  | 1    | 1.000   | 4                     | 0        | 0.125   |
|                               | No                      | 39                 | 13   |         | 32                    | 20       |         |
| Histological grade (Anneroth) | Well differentiated     | 15                 | 3    | 0.326   | 9                     | 9        | 0.128   |
|                               | Moderate differentiated | 27                 | 11   |         | 27                    | 11       |         |
|                               | Poor differentiated     | -                  | -    |         | -                     | -        |         |
| Histological grade (Bryne)    | Well differentiated     | 19                 | 5    | 0.632   | 13                    | 11       | 0.278   |
|                               | Moderate differentiated | 22                 | 8    |         | 21                    | 9        |         |
|                               | Poor differentiated     | 1                  | 1    |         | 2                     | 0        |         |
| Mitosis *                     | 0-1/hpf                 | 13                 | 4    | 0.580   | 8                     | 9        | 0.059   |
|                               | 2-3/hpf                 | 12                 | 6    |         | 16                    | 2        |         |

|                                       |                   |    |    |          |    |    |       |
|---------------------------------------|-------------------|----|----|----------|----|----|-------|
|                                       | 4-5/hpf           | 13 | 2  |          | 9  | 6  |       |
|                                       | >5/hpf            | 4  | 2  |          | 3  | 3  |       |
| <b>Lymphoplasmacytic infiltration</b> | Weak              | 8  | 0  |          | 3  | 5  |       |
|                                       | Moderate          | 16 | 7  | 0.213    | 14 | 9  | 0.133 |
|                                       | Marked            | 18 | 7  |          | 19 | 6  |       |
| <b>Necrosis</b>                       | Yes               | 14 | 5  |          | 13 | 6  |       |
|                                       | No                | 28 | 9  | 0.872    | 23 | 14 | 0.646 |
| <b>Pattern of invasion *</b>          | I                 | 18 | 0  |          | 10 | 8  |       |
|                                       | II                | 14 | 7  |          | 14 | 7  |       |
|                                       | III               | 7  | 7  | 0.007 ** | 9  | 5  | 0.517 |
|                                       | IV                | 3  | 0  |          | 3  | 0  |       |
| <b>Stage of invasion *</b>            | I                 | 0  | 0  |          | 0  | 0  |       |
|                                       | II                | 29 | 6  |          | 23 | 12 |       |
|                                       | III               | 12 | 8  | 0.148    | 12 | 8  | 0.693 |
|                                       | IV                | 1  | 0  |          | 1  | 0  |       |
| <b>Treatment *</b>                    | Surgery           | 9  | 2  |          | 7  | 4  |       |
|                                       | Chemotherapy      | 1  | 3  |          | 3  | 1  |       |
|                                       | Palliative        | 25 | 9  | 0.092    | 19 | 15 | 0.725 |
|                                       | treatment/support |    |    |          |    |    |       |
| <b>Tumour stage</b>                   | I + II            | 13 | 3  |          | 13 | 3  |       |
|                                       | III + IV          | 21 | 10 | 0.332    | 18 | 13 | 0.116 |

\* Pattern of invasion also evaluated using the categorization of I + II vs III + IV (P=0.067 and P=0.520) for extent and intensity scores respectively) and I + II + III vs IV (P=0.003 and P=0.352); stage of invasion also evaluated using the categorization of I + II vs III + IV (P=0.082 and P=0.775); and treatment using the categorization of treatment in Surgery/ Chemotherapy vs Palliative treatment/support (P=0.628 and P= 0.484). \*\* Pairwise multiple comparisons with bonferroni adjustment showed differences between pattern of invasion evaluated using the categorization of I vs III (P=0.008).

**Supplemental Table S6.** Univariate analysis of cancer-specific survival (CSS) of clinical and histopathological variables.

| Factors                   | Factors             | N  | Dead | CSS 1-Year * | CSS 2-Years * | CSS Mean CI 95% **       | P-Value |
|---------------------------|---------------------|----|------|--------------|---------------|--------------------------|---------|
| <b>Gender</b>             | Female              | 22 | 12   | 43.4         | 32.5          | 22.60±6.49 (9.88-35.33)  | 0.202   |
|                           | Male                | 28 | 21   | 21.1         | 15.8          | 6.59±1.73 (3.19-9.98)    |         |
| <b>Age (years)</b>        | <7                  | 25 | 16   | 28.8         | 23.1          | 16.31±5.3 (5.84-26.78)   | 0.890   |
|                           | ≥7                  | 25 | 17   | 31.9         | 21.2          | 8.85±2.11 (4.72-12.97)   |         |
| <b>Breed †</b>            | Small               | 8  | 4    | 34.3         | 34.3          | 9.72±3.78 (2.30-17.14)   | 0.247   |
|                           | Medium              | 3  | 1    | 66.7         | 66.7          | 11.32±3.81 (3.83-18.81)  |         |
|                           | Large               | 10 | 8    | 20.0         | 20.0          | 7.70±4.16 (0.00-15.86)   |         |
|                           | UB                  | 22 | 14   | 28.7         | 28.7          | 14.73±5.73 (3.50-25.95)  |         |
| <b>Tumour Location</b>    | Mouth (NOS)         | 7  | 4    | 33.3         | 33.3          | 9.01±3.17 (2.79-15.23)   | 0.643   |
|                           | Gingiva             | 18 | 9    | 40.0         | 40.0          | 24.98±7.34 (10.58-39.38) |         |
|                           | Tongue              | 10 | 8    | 25.0         | 0.00          | 6.26±2.69 (0.98-11.52)   |         |
|                           | Oropharynx          | 8  | 7    | 0.00         | 0.00          | 4.02±1.09 (1.89-6.16)    |         |
|                           | Palate              | 7  | 5    | 28.6         | 28.6          | 8.39±3.98 (0.60-16.18)   |         |
| <b>Histological type</b>  | Papillary SCC       | 6  | 1    | 80.0         | 80.0          | 48.30±9.30 (30.07-66.53) | 0.013   |
|                           | Conventional SCC    | 44 | 32   | 24.1         | 13.4          | 6.94±1.43 (4.13-9.75)    |         |
| <b>Bone Invasion</b>      | Yes                 | 8  | 4    | 35.0         | 35.0          | 21.35±11.33 (0.00-43.56) | 0.856   |
|                           | No                  | 42 | 29   | 30.4         | 20.2          | 10.45±2.20 (6.14-14.77)  |         |
| <b>Vascular Invasion</b>  | Yes                 | 4  | 2    | 50.0         | 50.0          | 11.71±5.29 (1.34-22.09)  | 0.689   |
|                           | No                  | 46 | 31   | 29.6         | 19.8          | 15.08±3.97 (7.30-22.87)  |         |
| <b>Histological grade</b> | Well differentiated | 16 | 10   | 33.9         | 33.9          | 21.55±6.89 (8.04-35.06)  | 0.543   |

|                                       |                              |    |    |      |      |                           |       |
|---------------------------------------|------------------------------|----|----|------|------|---------------------------|-------|
| <b>(Anneroth)</b>                     | Moderate differentiated      | 34 | 23 | 28.7 | 16.4 | 7.97±1.75 (4.55-11.40)    |       |
|                                       | Poor differentiated          | 0  | 0  | 0    | 0    | 0                         |       |
| <b>Histological grade (Bryne)</b>     | Well differentiated          | 22 | 16 | 55.8 | 16.7 | 12.20±4.88 (2.63-21.77)   | 0.112 |
|                                       | Moderate differentiated      | 26 | 15 | 44.7 | 26.1 | 10.95±2.21 (6.62-15.28)   |       |
|                                       | Poor differentiated          | 2  | 2  | 0.00 | 0.00 | 1.35±0.15 (1.06-1.64)     |       |
| <b>Mitosis</b>                        | 0-1/hpf                      | 16 | 11 | 31.3 | 31.3 | 20.19±6.51 (7.43-32.94)   | 0.934 |
|                                       | 2-3/hpf                      | 15 | 10 | 23.5 | 0.00 | 6.58±2.28 (2.10-11.05)    |       |
|                                       | 4-5/hpf                      | 13 | 7  | 46.0 | 34.5 | 13.85±4.75 (4.54-23.16)   |       |
|                                       | >5/hpf                       | 6  | 5  | 16.7 | 16.7 | 6.88±3.41 (8.53-23.65)    |       |
| <b>Lymphoplasmacytic infiltration</b> | Weak                         | 15 | 13 | 31.0 | 31.0 | 6.18±1.87 (2.51-10.15)    | 0.448 |
|                                       | Moderate                     | 21 | 11 | 40.3 | 32.3 | 21.56±6.66 (8.51-34.61)   |       |
|                                       | Marked                       | 14 | 9  | 20.0 | 10.0 | 6.33±1.95 (2.51-9.85)     |       |
| <b>Necrosis</b>                       | Yes                          | 18 | 11 | 26.6 | 26.6 | 18.05±6.64 (5.05-31.06)   | 0.547 |
|                                       | No                           | 32 | 22 | 32.0 | 18.3 | 9.94±2.53 (4.98-14.90)    |       |
| <b>Pattern of invasion</b>            | I                            | 15 | 5  | 61.9 | 61.9 | 37.74±7.40 (23.24-52.25)  | 0.011 |
|                                       | II                           | 19 | 16 | 13.0 | 0.00 | 4.79±1.50 (1.84-7.74)     |       |
|                                       | III                          | 13 | 10 | 20.0 | 0.00 | 4.15±1.44 (1.33-6.97)     |       |
|                                       | IV                           | 3  | 2  | 33.3 | 33.3 | 7.84±5.90 (0.00-19.41)    |       |
| <b>Stage of invasion</b>              | I                            | 0  | 0  | 0    | 0    | 0                         | 0.009 |
|                                       | II                           | 31 | 17 | 42.9 | 25.0 | 19.58±5.77 (8.27-30.88)   |       |
|                                       | III                          | 18 | 15 | 12.3 | 12.3 | 4.75±1.90 (1.01-8.48)     |       |
|                                       | IV                           | 1  | 1  | 0.00 | 0.00 | 76.0±0.00 (76.00-76.00)   |       |
| <b>Treatment</b>                      | Surgery                      | 11 | 4  | 55.6 | 55.6 | 20.74±4.95 (11.03-30.44)  | 0.048 |
|                                       | Chemotherapy                 | 4  | 4  | 0.00 | 0.00 | 3.46±1.60 (0.33-6.58)     |       |
|                                       | Palliative treatment/support | 35 | 25 | 26.9 | 14.4 | 11.97±4.12 (3.89-20.05)   |       |
| <b>Tumour stage <sup>†</sup></b>      | I                            | 6  | 1  | 100  | 66.7 | 45.47±10.80 (24.29-66.64) | 0.001 |
|                                       | II                           | 9  | 4  | 50.8 | 50.8 | 12.73±3.45 (5.97-19.48)   |       |
|                                       | III                          | 12 | 8  | 13.9 | 13.9 | 4.50±1.41 (1.73-7.26)     |       |
|                                       | IV                           | 17 | 16 | 0.00 | 0.00 | 2.23±0.53 (1.20-3.27)     |       |
| <b>Tumour stage <sup>†</sup></b>      | I + II                       | 15 | 5  | 64.6 | 48.5 | 32.53±8.61 (15.66-49.40)  | 0.001 |
|                                       | III + IV                     | 29 | 24 | 99.0 | 99.0 | 3.45±0.74 (2.00-4.89)     |       |

Legend: UB, undetermined breed (including mixed breeds); NOS, not otherwise specified; SSC, squamous cell carcinoma; hpf, high power field. \* Cumulative proportion (%) of survival time; \*\* mean for survival time in months (cancer-specific survival); <sup>†</sup> Information not available for some patients.
